# Supplementary material
Source: publisher figshare collection journal article supplement (https://tandf.figshare.com/articles/dataset/_/9879278)
Supplement: Supplementary file 1 [file 1]

Archive with 2 entries (2 files):
- ibmk_a_1634763_sm8870.pdf
- ibmk_a_1634763_sm2414.jpg
