# Supplementary material
Source: publisher figshare collection journal article supplement (https://tandf.figshare.com/articles/dataset/_/9879278)
Supplement: Supplementary file 1 [file 1 › ibmk_a_1634763_sm8870.pdf]

Supplementary Table 1. Newcastle-Ottawa (NOS) ratings for studies included in the case control analysis

| No | Authors                | Year | Selection                   |                                 | Comparability         |                       |                                                                           |                           | Exposure                                          |                   |
|----|------------------------|------|-----------------------------|---------------------------------|-----------------------|-----------------------|---------------------------------------------------------------------------|---------------------------|---------------------------------------------------|-------------------|
|    |                        |      | Is case definition adequate | Representativeness of the cases | Selection of controls | Definition of control | Comparability of cases and control on the basis of the design or analysis | Ascertainment of exposure | Same method of ascertainment for cases & controls | Non-Response Rate |
| 1  | Spyridopoulos et al.   | 2007 | ★                           | ★                               | ★                     | ★                     | ★                                                                         | ★                         | ★                                                 | -                 |
| 2  | Liao, Schwartz et al.  | 2013 | ★                           | ★                               | ★                     | -                     | ★                                                                         | ★                         | ★                                                 | ★                 |
| 3  | Liao, Weinstein et al. | 2013 | ★                           | -                               | ★                     | ★                     | ★                                                                         | ★                         | ★                                                 | ★                 |
| 4  | Zhang et al.           | 2015 | ★                           | ★                               | -                     | ★                     | ★                                                                         | ★                         | ★                                                 | -                 |
| 5  | Choi et al.            | 2016 | ★                           | ★                               | -                     | ★                     | ★                                                                         | ★                         | ★                                                 | -                 |
| 6  | Wang et al.            | 2016 | ★                           | ★                               | -                     | ★                     | ★                                                                         | ★                         | ★                                                 | -                 |
| 7  | Liao et al.            | 2017 | ★                           | ★                               | ★                     | ★                     | ★                                                                         | ★                         | ★                                                 | ★                 |
