# Supplementary material
Source: publisher figshare collection journal article supplement (https://tandf.figshare.com/articles/dataset/_/9879278)

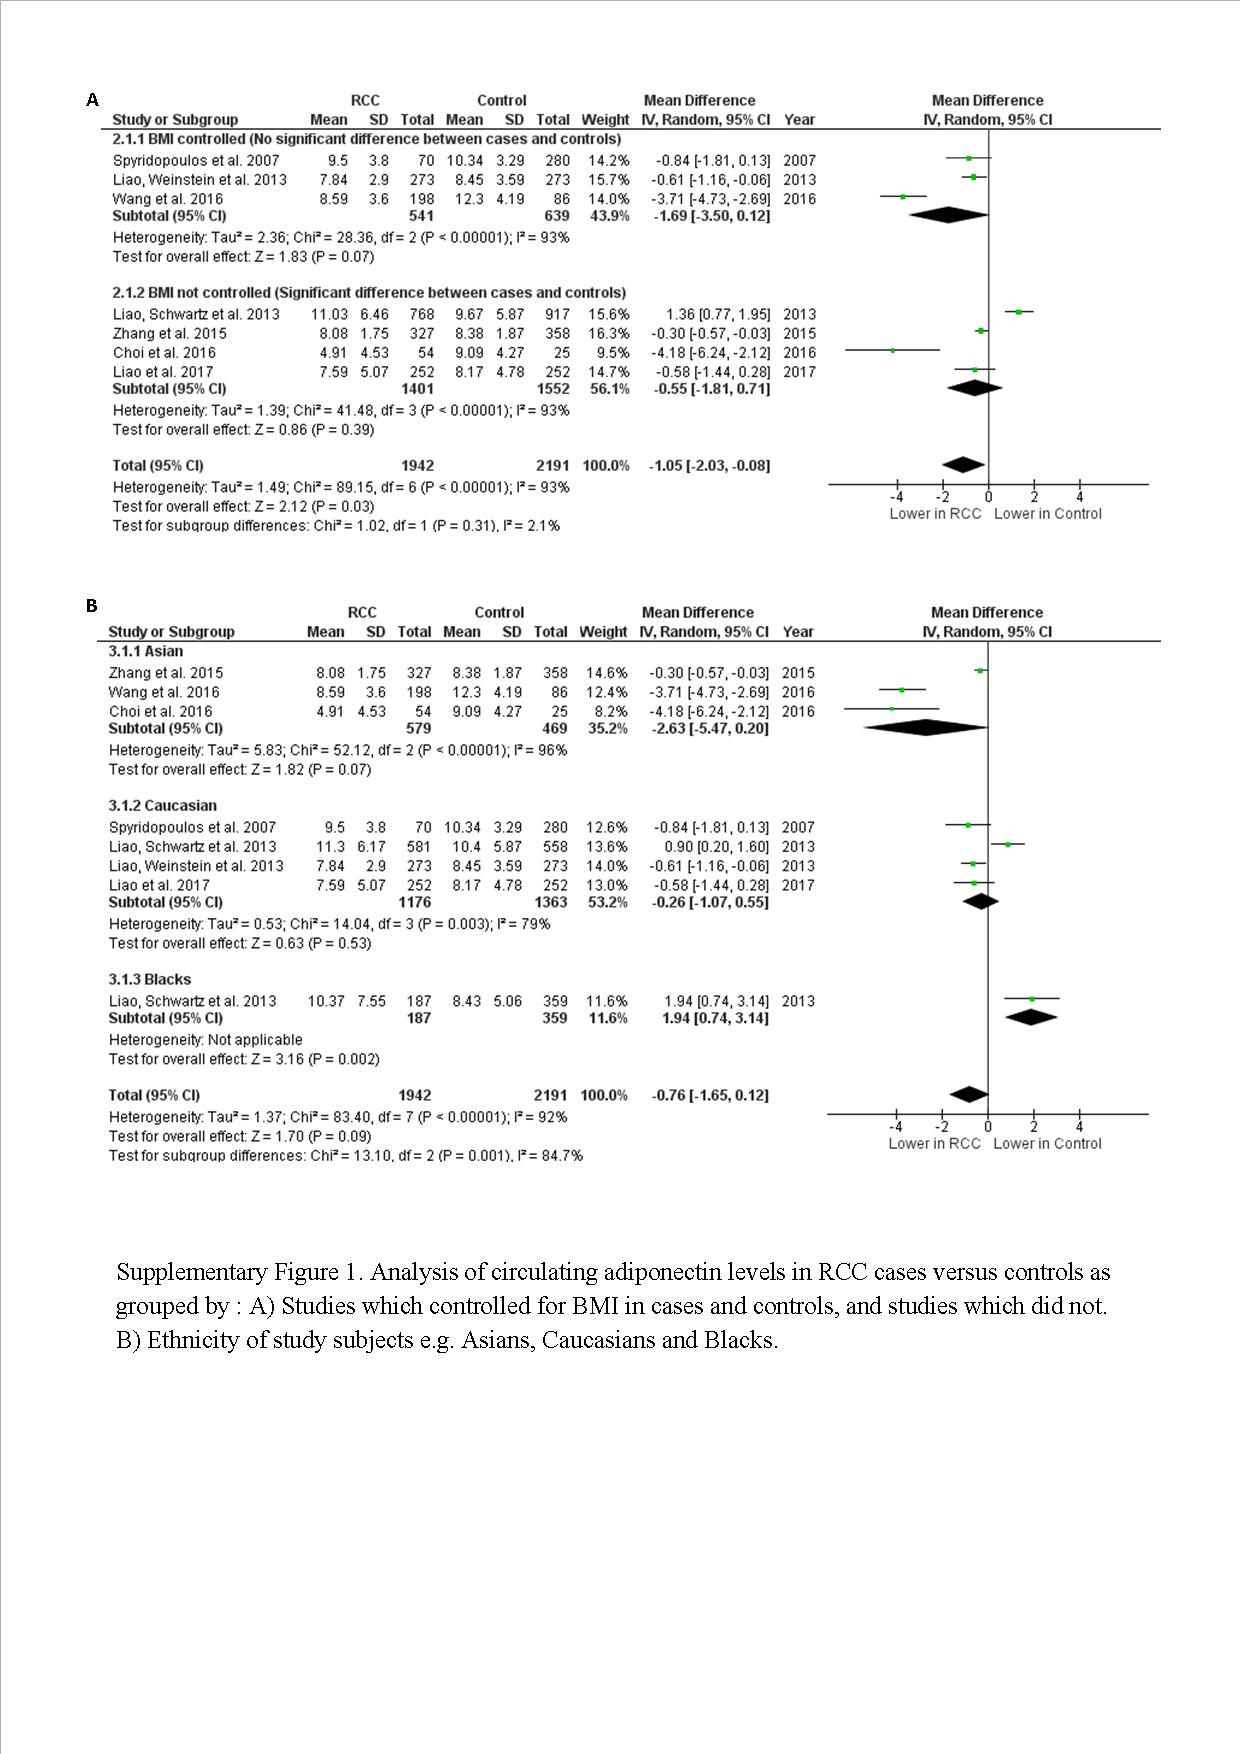

Supplement: Supplementary file 1 [file 1 › ibmk_a_1634763_sm2414.jpg]
